# Supplementary material for: Flight Recovery Method of Regional Multiairport Based on Risk Control Model
Source: Hindawi journal article supplement (doi:10.1155/2020/7105381), 2020-04-29
Supplement: f1 [file 7105381.f1.pdf]

## Supplementary Materials

Table 1 provides specific information on delayed flights mentioned in Section 4.1, which is important data for the experimental scenario. Delays in Flight 1-32 due to bad weather from the previous period have been delayed until 15:00. During the study period (15:00-16:59), a total of 215 flights needed to be resumed. Airport A is predicted to have 55 approach flights and 63 departure flights. Airport B is predicted to have 39 approach flights and 58 departure flights. For example, the following information can be obtained for the first flight: The flight is a departure flight parked on Apron BL4. The aircraft is medium-sized. The flight is expected to take off from runway 4 of B Airport, and pass through sector 2 and departure point DF1.

Table 1 Details of delayed flights

| Flight number | Type | Arrival-departure | Airport | Runway | Apron | Locations | Estimated runway time | Sector |
|---------------|------|-------------------|---------|--------|-------|-----------|-----------------------|--------|
| 1             | M    | D                 | B       | 4      | BL4   | DF1       | 1353                  | 2      |
| 2             | H    | D                 | A       | 3      | AL6   | DF3       | 1355                  | 4      |
| 3             | M    | D                 | B       | 4      | BL4   | DF1       | 1356                  | 2      |
| 4             | M    | D                 | B       | 4      | BL5   | DF1       | 1357                  | 2      |
| 5             | H    | D                 | B       | 4      | BL2   | DF4       | 1401                  | 4      |
| 6             | H    | D                 | A       | 3      | AL3   | DF2       | 1403                  | 1      |
| 7             | H    | D                 | B       | 4      | BL2   | DF2       | 1407                  | 1      |
| 8             | M    | D                 | B       | 4      | BL5   | DF4       | 1410                  | 4      |
| 9             | H    | D                 | B       | 4      | BL5   | DF4       | 1411                  | 4      |
| 10            | M    | D                 | B       | 4      | BL3   | DF1       | 1414                  | 2      |
| 11            | M    | D                 | B       | 4      | BL3   | DF3       | 1419                  | 4      |
| 12            | M    | D                 | B       | 4      | BL3   | DF3       | 1421                  | 4      |
| 13            | M    | D                 | A       | 1      | AL3   | DF1       | 1422                  | 2      |
| 14            | M    | D                 | B       | 4      | BL1   | DF3       | 1424                  | 4      |
| 15            | H    | D                 | B       | 4      | BL4   | DF1       | 1427                  | 2      |
| 16            | M    | D                 | A       | 3      | AL3   | DF5       | 1431                  | 4      |
| 17            | M    | D                 | A       | 1      | AL4   | DF1       | 1431                  | 2      |
| 18            | H    | D                 | B       | 4      | BL3   | DF1       | 1432                  | 2      |
| 19            | M    | D                 | A       | 3      | AL6   | DF6       | 1438                  | 2      |
| 20            | M    | D                 | B       | 4      | BL4   | DF1       | 1442                  | 2      |
| 21            | M    | D                 | A       | 3      | AL1   | DF2       | 1445                  | 1      |
| 22            | H    | D                 | B       | 4      | BL5   | DF3       | 1445                  | 4      |
| 23            | H    | D                 | A       | 3      | AL2   | DF2       | 1447                  | 1      |
| 24            | M    | D                 | A       | 1      | AL2   | DF6       | 1449                  | 2      |
| 25            | M    | D                 | A       | 3      | AL2   | DF2       | 1450                  | 1      |
| 26            | M    | D                 | A       | 1      | AL4   | DF1       | 1451                  | 2      |

---

|    |   |   |   |   |     |     |      |   |
|----|---|---|---|---|-----|-----|------|---|
| 27 | M | D | A | 3 | AL2 | DF6 | 1453 | 2 |
| 28 | M | D | B | 4 | BL5 | DF3 | 1453 | 4 |
| 29 | H | D | A | 3 | AL2 | DF2 | 1455 | 1 |
| 30 | H | D | A | 1 | AL1 | DF4 | 1458 | 4 |
| 31 | M | D | B | 4 | BL3 | DF4 | 1458 | 4 |
| 32 | M | D | A | 3 | AL3 | DF1 | 1459 | 2 |
| 33 | H | A | A | 2 | AL5 | AF1 | 1501 | 1 |
| 34 | M | D | B | 4 | BL3 | DF4 | 1501 | 4 |
| 35 | H | A | B | 5 | BL2 | AF1 | 1502 | 1 |
| 36 | M | A | A | 2 | AL1 | AF5 | 1503 | 4 |
| 37 | M | D | B | 4 | BL3 | DF2 | 1503 | 1 |
| 38 | M | A | A | 2 | AL1 | AF1 | 1505 | 1 |
| 39 | H | A | B | 5 | BL5 | AF2 | 1505 | 3 |
| 40 | M | D | B | 4 | BL1 | DF1 | 1505 | 2 |
| 41 | M | A | A | 2 | AL2 | AF1 | 1506 | 1 |
| 42 | M | D | A | 1 | AL4 | DF5 | 1506 | 4 |
| 43 | H | A | A | 2 | AL5 | AF1 | 1507 | 1 |
| 44 | H | A | B | 5 | BL3 | AF2 | 1507 | 3 |
| 45 | H | D | B | 4 | BL3 | DF2 | 1508 | 1 |
| 46 | M | D | A | 1 | AL3 | DF4 | 1508 | 4 |
| 47 | M | A | B | 5 | BL5 | AF1 | 1509 | 1 |
| 48 | H | D | A | 1 | AL6 | DF5 | 1510 | 4 |
| 49 | M | D | B | 4 | BL4 | DF4 | 1510 | 4 |
| 50 | M | A | A | 2 | AL3 | AF1 | 1511 | 1 |
| 51 | H | D | A | 1 | AL1 | DF6 | 1513 | 2 |
| 52 | H | D | A | 3 | AL4 | DF6 | 1514 | 2 |
| 53 | M | A | A | 3 | AL2 | AF4 | 1515 | 4 |
| 54 | M | A | B | 5 | BL5 | AF2 | 1515 | 3 |
| 55 | M | D | B | 4 | BL3 | DF1 | 1516 | 2 |
| 56 | H | A | B | 5 | BL1 | AF1 | 1517 | 1 |
| 57 | M | D | B | 4 | BL3 | DF1 | 1517 | 2 |
| 58 | M | D | A | 3 | AL1 | DF5 | 1518 | 4 |
| 59 | M | D | A | 3 | AL3 | DF2 | 1519 | 1 |
| 60 | H | A | A | 2 | AL5 | AF2 | 1520 | 3 |
| 61 | M | D | B | 4 | BL4 | DF1 | 1521 | 2 |
| 62 | M | D | A | 1 | AL4 | DF1 | 1522 | 2 |
| 63 | M | A | A | 2 | AL2 | AF4 | 1523 | 4 |
| 64 | H | D | B | 4 | BL5 | DF1 | 1523 | 2 |
| 65 | M | D | A | 1 | AL3 | DF1 | 1523 | 2 |
| 66 | M | A | A | 2 | AL5 | AF1 | 1524 | 1 |
| 67 | M | D | A | 3 | AL4 | DF2 | 1524 | 1 |
| 68 | M | A | B | 5 | BL5 | AF1 | 1527 | 1 |
| 69 | H | A | A | 2 | AL2 | AF2 | 1528 | 3 |

---

---

|     |   |   |   |   |     |     |      |   |
|-----|---|---|---|---|-----|-----|------|---|
| 70  | M | A | A | 2 | AL3 | AF2 | 1529 | 3 |
| 71  | H | A | B | 5 | BL4 | AF2 | 1529 | 3 |
| 72  | H | D | A | 3 | AL1 | DF5 | 1530 | 4 |
| 73  | M | D | A | 3 | AL4 | DF6 | 1531 | 2 |
| 74  | H | A | A | 3 | AL5 | AF1 | 1532 | 1 |
| 75  | M | A | B | 5 | BL3 | AF1 | 1532 | 1 |
| 76  | H | D | B | 4 | BL3 | DF1 | 1532 | 2 |
| 77  | M | D | A | 1 | AL4 | DF1 | 1532 | 2 |
| 78  | M | D | B | 4 | BL2 | DF1 | 1534 | 2 |
| 79  | H | D | A | 1 | AL3 | DF3 | 1534 | 4 |
| 80  | M | A | A | 2 | AL3 | AF2 | 1535 | 3 |
| 81  | M | D | A | 1 | AL4 | DF1 | 1535 | 2 |
| 82  | M | A | B | 5 | BL1 | AF1 | 1537 | 1 |
| 83  | M | A | B | 5 | BL4 | AF1 | 1538 | 1 |
| 84  | M | D | B | 4 | BL5 | DF1 | 1538 | 2 |
| 85  | M | A | A | 3 | AL6 | AF1 | 1539 | 1 |
| 86  | M | A | B | 5 | BL1 | AF1 | 1540 | 1 |
| 87  | M | D | B | 4 | BL3 | DF4 | 1540 | 4 |
| 88  | M | A | A | 2 | AL1 | AF2 | 1541 | 3 |
| 89  | M | A | B | 5 | BL3 | AF2 | 1541 | 3 |
| 90  | H | D | B | 4 | BL3 | DF1 | 1541 | 2 |
| 91  | H | A | A | 2 | AL2 | AF4 | 1542 | 4 |
| 92  | M | D | B | 4 | BL4 | DF1 | 1543 | 2 |
| 93  | M | A | A | 3 | AL2 | AF5 | 1546 | 4 |
| 94  | M | A | A | 2 | AL4 | AF4 | 1547 | 4 |
| 95  | M | A | A | 2 | AL6 | AF2 | 1549 | 3 |
| 96  | H | D | A | 1 | AL4 | DF1 | 1549 | 2 |
| 97  | M | D | B | 4 | BL5 | DF3 | 1549 | 4 |
| 98  | H | D | A | 1 | AL4 | DF1 | 1550 | 2 |
| 99  | H | D | B | 4 | BL3 | DF3 | 1550 | 4 |
| 100 | M | D | A | 1 | AL1 | DF1 | 1551 | 2 |
| 101 | H | A | B | 5 | BL3 | AF1 | 1552 | 1 |
| 102 | M | A | B | 5 | BL4 | AF2 | 1552 | 3 |
| 103 | H | D | B | 4 | BL1 | DF1 | 1552 | 2 |
| 104 | M | D | A | 1 | AL6 | DF3 | 1552 | 4 |
| 105 | H | A | A | 3 | AL6 | AF5 | 1554 | 4 |
| 106 | M | A | B | 5 | BL2 | AF2 | 1554 | 3 |
| 107 | H | D | B | 4 | BL4 | DF3 | 1554 | 4 |
| 108 | M | A | A | 2 | AL6 | AF2 | 1555 | 3 |
| 109 | H | A | B | 5 | BL1 | AF2 | 1555 | 3 |
| 110 | M | D | B | 4 | BL4 | DF1 | 1555 | 2 |
| 111 | H | D | A | 1 | AL5 | DF2 | 1555 | 1 |
| 112 | H | A | B | 5 | BL3 | AF1 | 1556 | 1 |

---

---

|     |   |   |   |   |     |     |      |   |
|-----|---|---|---|---|-----|-----|------|---|
| 113 | M | D | A | 3 | AL3 | DF4 | 1556 | 4 |
| 114 | M | A | A | 3 | AL1 | AF4 | 1557 | 4 |
| 115 | H | A | B | 5 | BL3 | AF1 | 1557 | 1 |
| 116 | M | D | B | 4 | BL1 | DF4 | 1558 | 4 |
| 117 | H | A | B | 5 | BL3 | AF2 | 1559 | 3 |
| 118 | M | D | A | 1 | AL2 | DF2 | 1559 | 1 |
| 119 | M | A | A | 3 | AL3 | AF3 | 1600 | 3 |
| 120 | M | A | B | 5 | BL4 | AF2 | 1600 | 3 |
| 121 | M | A | B | 5 | BL4 | AF2 | 1601 | 3 |
| 122 | H | D | A | 3 | AL6 | DF6 | 1601 | 2 |
| 123 | M | A | A | 3 | AL3 | AF5 | 1602 | 4 |
| 124 | M | D | A | 3 | AL4 | DF1 | 1602 | 2 |
| 125 | M | D | B | 4 | BL4 | DF1 | 1603 | 2 |
| 126 | M | A | B | 5 | BL3 | AF2 | 1604 | 3 |
| 127 | M | A | A | 2 | AL2 | AF5 | 1605 | 4 |
| 128 | H | A | B | 5 | BL3 | AF1 | 1605 | 1 |
| 129 | M | A | A | 3 | AL2 | AF5 | 1607 | 4 |
| 130 | M | D | A | 1 | AL4 | DF5 | 1607 | 4 |
| 131 | M | D | A | 1 | AL1 | DF4 | 1607 | 4 |
| 132 | M | A | A | 3 | AL2 | AF1 | 1608 | 1 |
| 133 | M | A | A | 2 | AL4 | AF1 | 1608 | 1 |
| 134 | H | D | A | 3 | AL5 | DF5 | 1609 | 4 |
| 135 | M | D | A | 1 | AL4 | DF2 | 1609 | 1 |
| 136 | M | A | A | 3 | AL2 | AF1 | 1610 | 1 |
| 137 | M | D | B | 4 | BL5 | DF1 | 1610 | 2 |
| 138 | M | A | A | 2 | AL6 | AF5 | 1611 | 4 |
| 139 | M | A | B | 5 | BL4 | AF1 | 1611 | 1 |
| 140 | M | D | B | 4 | BL5 | DF1 | 1611 | 2 |
| 141 | M | D | A | 3 | AL1 | DF3 | 1611 | 4 |
| 142 | H | D | B | 4 | BL5 | DF3 | 1612 | 4 |
| 143 | H | A | A | 3 | AL2 | AF1 | 1613 | 1 |
| 144 | M | A | A | 2 | AL1 | AF1 | 1615 | 1 |
| 145 | M | A | A | 2 | AL4 | AF4 | 1615 | 4 |
| 146 | M | A | B | 5 | BL5 | AF1 | 1615 | 1 |
| 147 | H | A | B | 5 | BL2 | AF1 | 1615 | 1 |
| 148 | H | A | A | 3 | AL6 | AF3 | 1615 | 3 |
| 149 | H | D | B | 4 | BL1 | DF2 | 1615 | 1 |
| 150 | M | D | B | 4 | BL5 | DF1 | 1617 | 2 |
| 151 | M | A | B | 5 | BL4 | AF2 | 1618 | 3 |
| 152 | M | A | A | 3 | AL4 | AF2 | 1619 | 3 |
| 153 | M | D | A | 1 | AL3 | DF1 | 1619 | 2 |
| 154 | M | A | B | 5 | BL3 | AF2 | 1620 | 3 |
| 155 | M | D | A | 1 | AL1 | DF5 | 1620 | 4 |

---

---

|     |   |   |   |   |     |     |      |   |
|-----|---|---|---|---|-----|-----|------|---|
| 156 | M | D | B | 4 | BL4 | DF4 | 1620 | 4 |
| 157 | M | A | A | 3 | AL6 | AF2 | 1621 | 3 |
| 158 | M | D | B | 4 | BL5 | DF3 | 1621 | 4 |
| 159 | H | D | B | 4 | BL1 | DF1 | 1622 | 2 |
| 160 | M | A | A | 3 | AL3 | AF5 | 1623 | 4 |
| 161 | H | A | A | 2 | AL2 | AF2 | 1623 | 3 |
| 162 | M | D | A | 1 | AL1 | DF6 | 1623 | 2 |
| 163 | M | A | A | 3 | AL1 | AF4 | 1624 | 4 |
| 164 | M | D | A | 1 | AL1 | DF1 | 1624 | 2 |
| 165 | H | D | B | 4 | BL5 | DF1 | 1625 | 2 |
| 166 | M | D | A | 1 | AL2 | DF2 | 1625 | 1 |
| 167 | M | A | B | 5 | BL3 | AF1 | 1627 | 1 |
| 168 | M | D | B | 4 | BL3 | DF2 | 1627 | 1 |
| 169 | M | D | A | 1 | AL2 | DF1 | 1627 | 2 |
| 170 | M | A | B | 5 | BL5 | AF1 | 1628 | 1 |
| 171 | H | A | A | 2 | AL1 | AF4 | 1628 | 4 |
| 172 | M | D | B | 4 | BL1 | DF4 | 1629 | 4 |
| 173 | M | A | B | 5 | BL5 | AF5 | 1630 | 4 |
| 174 | M | D | B | 4 | BL5 | DF3 | 1630 | 4 |
| 175 | M | D | A | 1 | AL3 | DF1 | 1631 | 2 |
| 176 | M | A | B | 5 | BL5 | AF2 | 1632 | 3 |
| 177 | M | D | A | 3 | AL4 | DF6 | 1632 | 2 |
| 178 | M | A | A | 2 | AL1 | AF2 | 1633 | 3 |
| 179 | H | A | A | 2 | AL4 | AF4 | 1633 | 4 |
| 180 | M | D | B | 4 | BL5 | DF3 | 1633 | 4 |
| 181 | H | A | A | 2 | AL3 | AF5 | 1634 | 4 |
| 182 | M | D | A | 1 | AL4 | DF1 | 1634 | 2 |
| 183 | M | D | B | 4 | BL4 | DF1 | 1635 | 2 |
| 184 | M | A | A | 3 | AL5 | AF2 | 1637 | 3 |
| 185 | M | A | A | 3 | AL1 | AF2 | 1638 | 3 |
| 186 | H | D | A | 3 | AL6 | DF5 | 1638 | 4 |
| 187 | H | A | A | 2 | AL2 | AF5 | 1339 | 4 |
| 188 | H | A | B | 5 | BL5 | AF1 | 1639 | 1 |
| 189 | M | D | A | 3 | AL3 | DF5 | 1639 | 4 |
| 190 | M | A | A | 2 | AL4 | AF3 | 1640 | 3 |
| 191 | M | D | A | 1 | AL3 | DF2 | 1641 | 1 |
| 192 | M | D | B | 4 | BL4 | DF3 | 1642 | 4 |
| 193 | H | A | B | 5 | BL3 | AF2 | 1642 | 3 |
| 194 | M | D | A | 3 | AL3 | DF6 | 1643 | 2 |
| 195 | M | A | A | 3 | AL3 | AF1 | 1644 | 1 |
| 196 | M | A | A | 3 | AL1 | AF1 | 1644 | 1 |
| 197 | H | D | B | 4 | BL2 | DF3 | 1644 | 4 |
| 198 | M | D | A | 1 | AL3 | DF1 | 1645 | 2 |

---

---

|     |   |   |   |   |     |     |      |   |
|-----|---|---|---|---|-----|-----|------|---|
| 199 | M | A | B | 5 | BL5 | AF2 | 1646 | 3 |
| 200 | M | D | A | 3 | AL6 | DF6 | 1646 | 2 |
| 201 | M | D | B | 4 | BL5 | DF1 | 1646 | 2 |
| 202 | M | A | A | 3 | AL4 | AF1 | 1648 | 1 |
| 203 | M | A | A | 3 | AL1 | AF1 | 1649 | 1 |
| 204 | H | A | A | 3 | AL5 | AF1 | 1649 | 1 |
| 205 | M | A | B | 5 | BL3 | AF2 | 1649 | 3 |
| 206 | H | D | A | 3 | AL3 | DF6 | 1649 | 2 |
| 207 | M | A | A | 2 | AL4 | AF5 | 1650 | 4 |
| 208 | M | D | A | 3 | AL2 | DF5 | 1650 | 4 |
| 209 | M | D | B | 4 | BL1 | DF4 | 1650 | 4 |
| 210 | M | D | A | 1 | AL3 | DF1 | 1656 | 2 |
| 211 | H | D | B | 4 | BL2 | DF4 | 1656 | 4 |
| 212 | H | A | A | 2 | AL2 | AF3 | 1657 | 3 |
| 213 | H | D | A | 1 | AL1 | DF2 | 1657 | 1 |
| 214 | M | A | B | 5 | BL4 | AF2 | 1658 | 3 |
| 215 | M | A | B | 5 | BL4 | AF1 | 1659 | 1 |

---
